# Supplementary material
Source: Springer Nature journal article supplement (https://www.springermedizin.de/resource/supplementary/12887_2011_506_MOESM5_ESM.pdf/9475312)

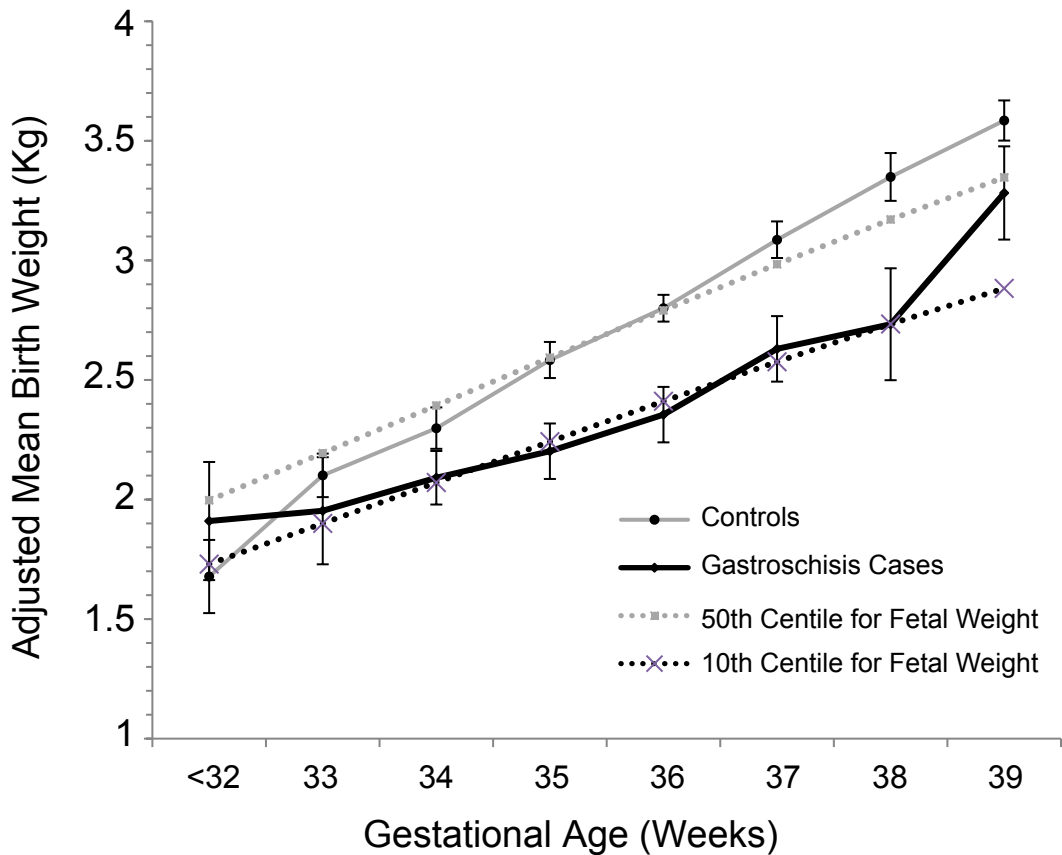

Supplement: MOESM5 [file 9475312]
